# Supplementary material
Source: Royal Society of Chemistry journal article supplement (doi:10.1039/d6tc00536e)
Supplement: d6tc00536e1.pdf [file d6tc00536e1.pdf]

## Supporting Information

# Energy Dissipation and Electromechanical Response in Dielectric Actuation of Liquid Crystal Elastomers

*Justin M. Speregen, Hayden E. Fowler, Timothy J. White*

J.M. Speregen, T. J. White: Materials Science and Engineering Program University of Colorado  
Boulder Boulder, CO 80309, USA

H. E. Fowler, T. J. White: Department of Chemical and Biological Engineering University of  
Colorado Boulder Boulder, CO 80309, USA

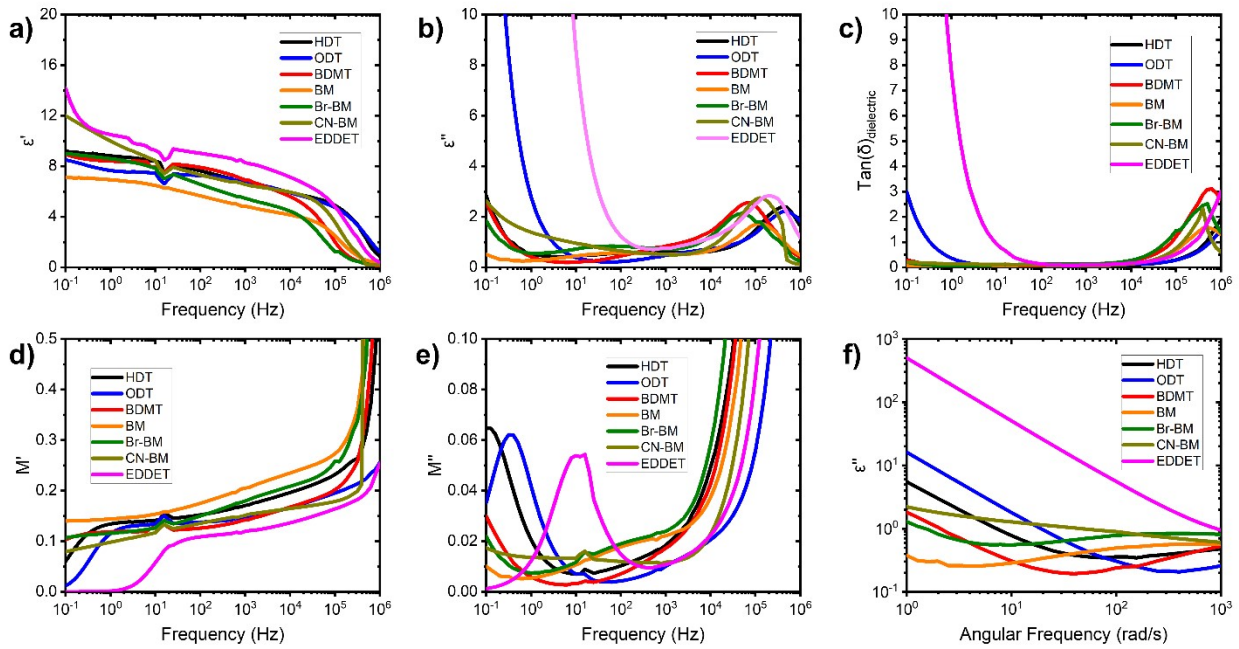

**Figure S1.** a) Real and b) imaginary relative permittivity and c) dielectric loss factor of LCEs as a function of frequency. d) Real and e) imaginary components of relative electric modulus of LCEs and the peak in  $M''$  denotes the transition from Debye relaxation to ionic conduction. f) Log-log plot of  $\epsilon''$  vs.  $\omega$  to analyze ionic conduction regime of permittivity.

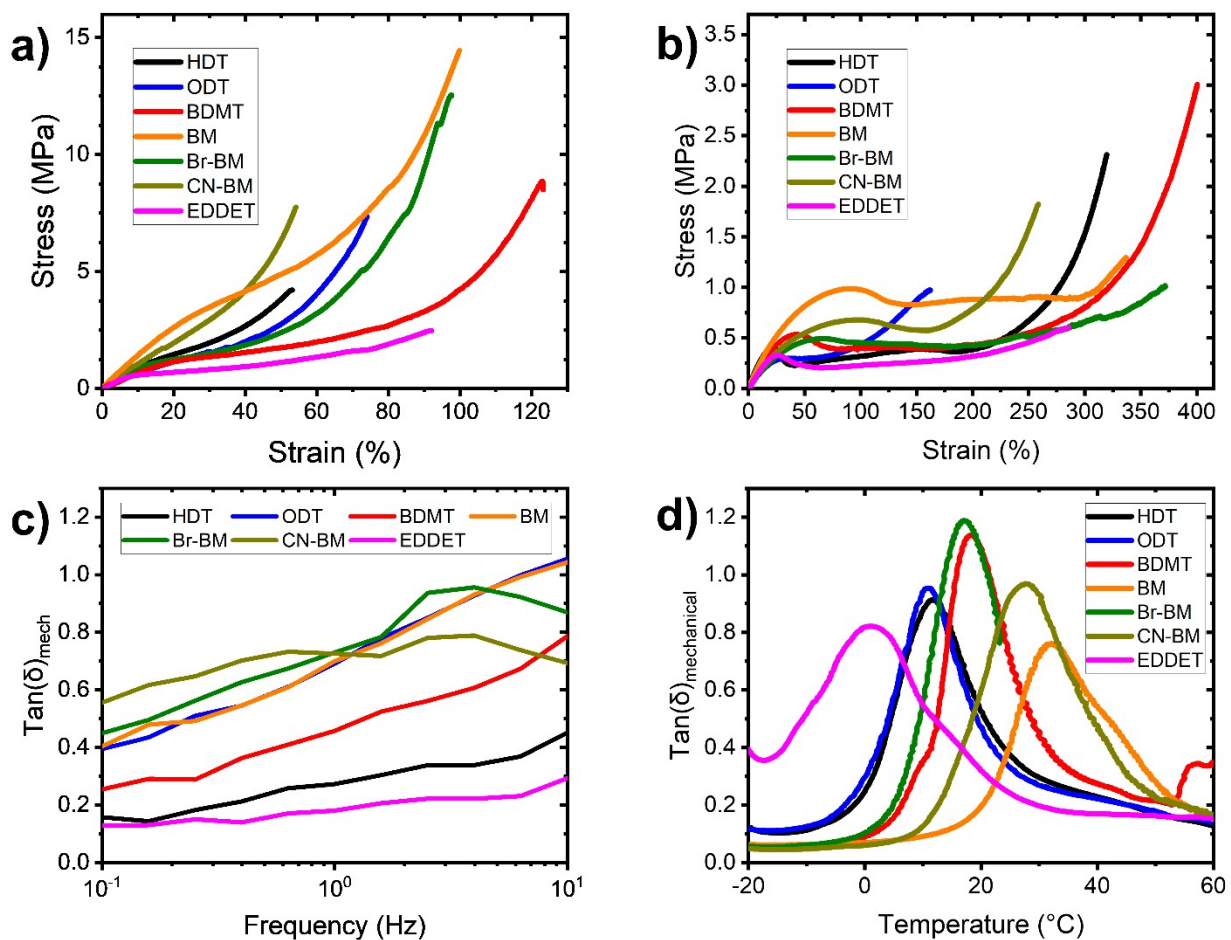

**Figure S2.** Uniaxial tensile response of LCEs a) parallel and b) perpendicular to the director.

Mechanical loss factor of LCEs measured perpendicular to the director as a function of c)

frequency and d) temperature.

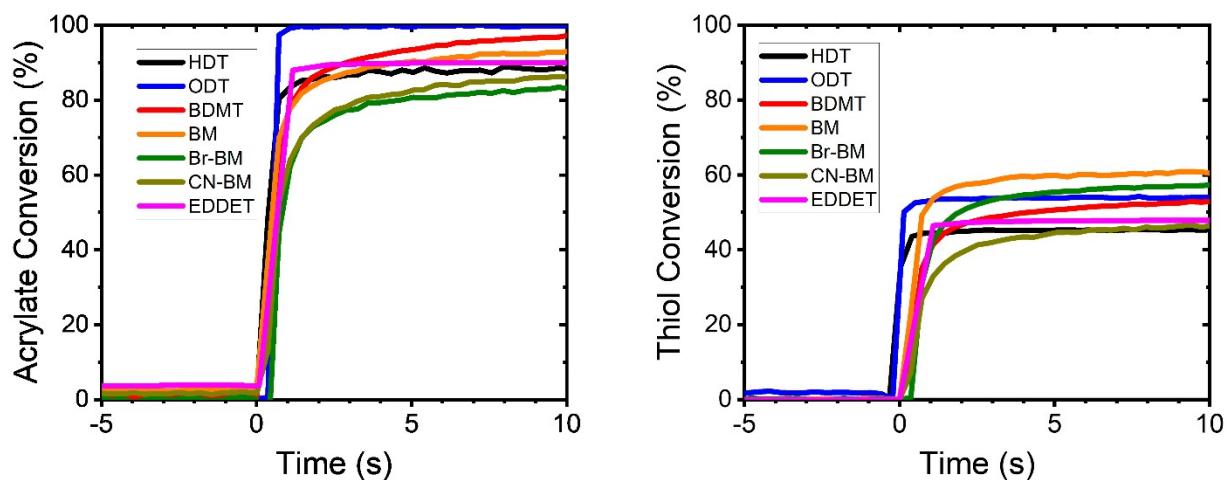

**Figure S3.** Acrylate and thiol conversion of LCEs measured via FTIR

| LCE   | Actuation Parameters      |                       |                                | Relaxation Parameters             |                       |                                |
|-------|---------------------------|-----------------------|--------------------------------|-----------------------------------|-----------------------|--------------------------------|
|       | Strain @ $t_{\infty}$ (%) | Time scale ( $\tau$ ) | Stretching factor ( $\alpha$ ) | Fraction of strain @ $t_{\infty}$ | Time scale ( $\tau$ ) | Stretching factor ( $\alpha$ ) |
| HDT   | 5.46                      | 132.8s                | 0.353                          | 0                                 | 8.2s                  | 0.405                          |
| ODT   | 4.27                      | 104.8s                | 0.293                          | 0                                 | 20.2s                 | 0.393                          |
| BDMT  | 4.12                      | 36.1s                 | 0.455                          | 0.23                              | 4.5s                  | 0.504                          |
| BM    | 1.37                      | 45.5s                 | 0.455                          | 0.31                              | 13.4s                 | 0.666                          |
| Br-BM | 7.16                      | 1003.7s               | 0.595                          | 0.32                              | 47.4s                 | 0.289                          |
| CN-BM | 18.33                     | 109.2s                | 0.513                          | 0.14                              | 12.4s                 | 0.515                          |

**Figure S4.** Parameters for theoretical long-term behavior of DLCEAs. Total actuation strain and the percentage of recoverable strain are captured by the first parameter. The characteristic time scale of viscoelastic deformation and recovery are captured by the second parameter,  $\tau$ . The stretching factor,  $\alpha$ , indicates how broad the distribution of time scales are distributed; as  $\alpha$  approaches 1 there is a single characteristic time scale forming a true exponential distribution.
